1 ***Ostreococcus tauri* is a high-lipid content green algae that extrudes clustered lipid droplets**

2

3 Chuck R. Smallwood<sup>1</sup>, William Chrisler<sup>1</sup>, Jian-Hua Chen<sup>2</sup>, Emma Patello<sup>1</sup>, Mathew Thomas<sup>3</sup>,  
4 Rosanne Boudreau<sup>2</sup>, Axel Ekman<sup>2</sup>, Hongfei Wang<sup>1†</sup>, Gerry McDermott<sup>2</sup>, & James E. Evans<sup>1\*</sup>

5

6 1) Environmental Molecular Sciences Laboratory, Pacific Northwest National Laboratory, 3335  
7 Innovation Blvd., Richland, WA 99354, USA

8 2) Department of Anatomy, School of Medicine, UCSF, San Francisco, CA 94110, USA;

9 Molecular Biophysics and Integrated Bioimaging, Lawrence Berkeley National Laboratory,  
10 Berkeley, CA 94720, USA

11 3) Physical and Chemical Sciences Directorate, Pacific Northwest National Laboratory, P.O.  
12 Box 999, Richland, WA 99352, USA

13

14 \* **Corresponding Author(s):** james.evans@pnnl.gov

15 † Current Address: Department of Chemistry, Fudan University, Shanghai, 200433, China

16

17 **One Sentence Summary:** The smallest known eukaryote *Ostreococcus tauri* is oleaginous and  
18 sheds lipid droplets as pea-pod like membrane enclosed clusters.

19

20 **Abstract**

21 Lipid droplet biogenesis, accumulation and secretion is an important field of research spanning  
22 biofuel feedstock production in algae and yeast to plant-microbe symbiosis or human metabolic  
23 disorders and other diseases. Here we evaluate the critical elements that influence lipid  
24 accumulation in the highly simplified and smallest known eukaryote *Ostreococcus tauri* and  
25 identify several conditions that satisfy its classification as an oleaginous green alga. In addition,  
26 these experiments revealed the release of excess lipids in pea-pod like structures where many  
27 dense lipid droplets are clustered in a linear fashion surrounded by an enveloping membrane  
28 which contrasts with known mechanisms from other eukaryotes. These results highlight the  
29 potential for *Ostreococcus tauri* to probe the evolution of lipid droplet dynamics as an emerging  
30 model organism with a compacted eukaryotic genome and also to impact lipid feedstock  
31 bioproduction applications either directly or using synthetic biology.

32

33 **Keywords:** microalgae, bioenergy, lipid droplet, soft x-ray nanotomography, bioimaging, carbon  
34 energy, nitrogen, nitrate, phosphate, mamiellophyceae, prasinophytes,

35

### 36 **Main Text**

37 Bioproducts from oleaginous green algae include food additives, cosmetics, commodity  
38 chemicals and lipid droplet feedstocks for biofuels<sup>1</sup>. Recent reviews of bioprocessing described  
39 the costs associated with biomass production as the primary bottleneck for achieving competitive  
40 pricing while low- to no-energy harvesting options can also improve the cost-benefit by  
41 efficiently isolating the bioproduct from cellular material<sup>2,3</sup>. To accelerate more cost-effective  
42 bioproduction of lipid feedstocks it is imperative to identify new species or cellular mechanisms  
43 that can be exploited to enhance production or harvesting. Lipid droplets and their dynamics are  
44 also important for a range of human health related processes with roles in lipid storage,  
45 metabolism, signaling, inflammation and cancer<sup>4</sup>.

46 *Ostreococcus tauri* is phototrophic and the smallest known free-living eukaryote<sup>5</sup>. Found in  
47 most oceans worldwide, this dominant picoplankton can thrive in adverse environments such as  
48 copper contaminated seawater<sup>6</sup>. Under standard growth conditions, the cell dimensions are  
49 around 0.8-1.0 micron in thickness and about 1.0-1.4 microns in diameter and this houses a  
50 highly simplified ultrastructure with a single nucleus, chloroplast and mitochondrion while  
51 lacking both a cell wall and flagella<sup>7</sup>. *O. tauri* also has a highly compacted genome with just  
52 under 8,000 genes<sup>8,9</sup>. The simplified state of both the cell architecture and its genome, combined  
53 with published protocols for genetic tractability have positioned *O. tauri* as an emerging model  
54 organism that has already informed mechanistic details underlying circadian rhythm, cell  
55 division, and modeling kinome networks<sup>10-13</sup>. We posited that the compact nature of *O. tauri*  
56 could also reveal new insights to lipid droplet dynamics.

57 In many eukaryotes, lipid accumulation is inducible by modulating light intensity, altering  
58 temperature, pH, salinity or nutrient availability<sup>14-16</sup>. For example, different algae species have  
59 been shown to trigger neutral lipid (NL) accumulation upon iron, phosphorous, silicon  
60 (specifically for diatoms), sulfur and nitrogen nutrient starvation<sup>17-21</sup>. However, like many  
61 biological processes that evolved across diverse microorganisms, the precise mechanisms  
62 underlying NL accumulation (specifically triacylglycerols) due to nutrient availability varies

63 widely and in many cases, remains obscure<sup>15,22,23</sup>. Interestingly, the standard growth media for  
64 *O. tauri*, Keller (K) media, includes several nutrients (N, P, S, Fe) at concentrations around  $10^{-4}$ –  
65  $10^{-5}$  M that are known to induce triacylglycerol accumulation in other algae and oleaginous  
66 eukaryotes. Co-factors (Mo, Co, Mn, Zn) and vitamins (B1, B7, B12) are also present in K media  
67 but at much lower concentration around  $10^{-7}$ – $10^{-9}$  M<sup>24</sup>. Prior studies comparing growth of *O.*  
68 *tauri* under normal conditions versus nitrogen (N) starvation at 10% of normal nitrogen  
69 availability (media containing  $10^{-5}$  instead of  $10^{-4}$  M combined  $\text{NH}_4$  &  $\text{NO}_3$ ) have reported some  
70 elevated NL accumulation providing support that *O. tauri* is susceptible to similar environmental  
71 cues<sup>23,25,26</sup>. The presence of sulfur (S), phosphorus (P), and iron (Fe) in K-media at similar  
72 concentration as nitrogen therefore elicited the question of whether these other nutrients are truly  
73 required at elevated levels for normal growth of *O. tauri* and if their single or multiplexed  
74 removal would enhance lipid droplet production beyond simple N starvation.

75 For simplicity, we primarily focused this study on evaluating the effects of each major  
76 component in *O. tauri*'s standard growth media as nutrient starvation has typically yielded the  
77 highest levels of triacylglycerol feedstocks in other microalgae, diatoms and fungi. The  
78 simultaneous and complete depletion of both forms of available N (ammonium and nitrate)  
79 present in K media, induced NL production (Fig. 1) similar to previous reports<sup>14,27</sup>. Interestingly,  
80 media containing only nitrate as the bioavailable N source grew normal to the standard K media  
81 and had elevated but diffuse lipid signal. Whereas media containing only ammonium resulted in  
82 discrete lipid droplet formation, but to a lesser extent compared to total N deficient media.  
83 Phosphorous deprivation also triggered detectable NL accumulation while removal of sulfur and  
84 iron from Keller media exhibited minimal to no increases in lipid production and showed  
85 relatively normal growth (Fig. 1). As reported in other organisms, lowered total biomass yields  
86 were observed for simple N and P depletion.

87 Since complete N starvation showed elevated levels of NL accumulation, we evaluated the  
88 impact of variable N availability. Discrete lipid droplets were first detected in cells exposed to  
89 media lacking 80% of normal total N levels (Supp. Fig. 1). Further decreasing N availability led  
90 to less total biomass and lowered chlorophyll autofluorescence but increased the size and number  
91 of detected lipid droplets as well as cell size. Based on a trade-off between biomass and lipid  
92 yields, removal of 90% and 100% of normal N concentration were identified as favorable  
93 baselines for single nutrient starvation conditions. Given that complete removal of P from the

94 media also showed elevated NL accumulation, albeit significantly less than simple N  
95 deprivation, we explored whether the simultaneous depletion of both N and P could increase LD  
96 feedstocks further. Variable levels of P starvation using K media deprived of 90% N as the base  
97 were compared (Sup. Fig. 2) and discrete LDs were first detected in cells grown in media lacking  
98 60% of normal P levels. LD content increased with more severe starvation.

99 Although the increased lipid signal upon concurrent N and P starvation was intriguing, we  
100 also considered that the removal of the sole P present in the K media (beta-glycerol phosphate  
101 (bGP)) could also potentially deplete a bioactive form of glycerol. While *O. tauri* was expected  
102 to be a photoautotroph, other microalgae have been found to grow on glycerol as a carbon source  
103 <sup>28</sup>. Per its annotated genome, *O. tauri* lacks any pathway for direct utilization of glycerol-2-  
104 phosphate or annotated genes for bGP uptake. However, we discovered the presence of an  
105 alkaline phosphatase gene (Ot10g02060) in the KEGG database that likely participates in the  
106 folate biosynthesis pathway <sup>29</sup>. We hypothesized that *O. tauri* could potentially utilize the same  
107 alkaline phosphatase to enzymatically cleave phosphate from bGP extracellularly and  
108 subsequently generate pools of bioavailable P and glycerol that could each be taken up by the  
109 cell. To test this, we supplemented increasing levels of glycerol into our cell cultures while  
110 simultaneous depleting bGP in the K-90%N and K-100%N media. We found that increasing the  
111 glycerol concentration up to 50mM (well beyond that of normal bGP concentrations), resulted in  
112 significant increases of intracellular lipids while showing elevated (not depressed) biomass  
113 yields (Fig. 2 & Supp. Fig. 3). Beyond 50mM glycerol slower biomass accumulation is seen  
114 which likely results from detrimental osmotic effects impacting cell viability. While the  
115 bioimaging data clearly showed a dramatic increase in total lipid content, we also quantified the  
116 best lipid production condition from this screen. We subjected the cultures grown in K-100%N,  
117 K-100%N-100%P+50mMglycerol, K-90%M-60%bGP+50mMglycerol and K-90%M-  
118 60%bGP+20mMglycerol to conventional lipid extraction protocols. These conditions yielded  
119 total lipid content (dry lipid weight / dry biomass weight) of 24.7%, 25.7%, 31.2% and 30.8%  
120 respectively. Although the total lipid content appears similar for these conditions, it should be  
121 noted that the dry biomass total weight for the K-90%M-60%bGP+50mMglycerol was 146%  
122 that of K-100%N. The measured lipid content for both the K-90%M-60%bGP+50mMglycerol  
123 and K-90%M-60%bGP+20mMglycerol conditions surpass the 30% threshold for classification  
124 as a high-lipid content or oleaginous organism after only 4 days of starvation.

125 Surprisingly, bioimaging experiments also uncovered a previously unreported mechanism for  
126 lipid droplet extrusion. Eukaryotes typically release individual LDs if they release/secrete the  
127 LDs at all<sup>30,31</sup>. Initially, confocal experiments described above revealed conditions in which  
128 “pea-pod” like structures were present in the culture. These structures stained positive for NL  
129 and phospholipid but did not possess any chlorophyll autofluorescence (Fig. 3). Staining of  
130 nucleic acids with Hoechst labeling also failed to label nucleic acid in these pea-pod structures  
131 but did stain the nucleus of normal *O. tauri* cells. Similarly, the use of label-free Stimulated  
132 Raman Scattering microscopy on the same cells (tuned to a common nucleic acid peak at 1093  
133  $\text{cm}^{-1}$ ) again failed to identify any nucleic acid signatures in the pea-pod structures (Fig. 3).

134 A few of the confocal image sets showed evidence of oriented lipid droplets in blebs still  
135 fused to the main *O. tauri* cells (Fig. 4a). Thus, it seemed plausible that the free-floating pea-pod  
136 structures originated from *O. tauri*, and were probably formed through a concerted cell blebbing  
137 and unknown extrusion mechanism where clustered lipid droplets were released into solution  
138 surrounded by an enclosing outer phospholipid membrane. This sloughing mechanism does not  
139 appear related to cell death as longer incubation periods show continued biomass increases and  
140 stable chlorophyll per cell ratios. Additionally, although a variable lag time is present, all  
141 cultures tested here showed the ability to recover normal growth following a batch dilution into  
142 normal K media (Supplemental Figure 4).

143 Thus, to independently confirm the detection of LDs in pea-pod like structures we  
144 performed cryogenic soft X-ray nanotomography which is a quantitative imaging method that  
145 can compare the density of lipid accumulations under different environmental conditions at the  
146 single cell level. We indeed visualized free-floating pea-pod like structures containing only  
147 densities with linear absorption coefficients matching lipid droplets and even captured several  
148 cells wherein the intracellular lipid droplets were organized in a linear arrangement prior to their  
149 partitioning into a bleb-like structure (Fig. 4b and Sup. Movie 1).

150 Although the standard K media contains similar concentrations of iron, phosphorus, sulfur,  
151 nitrate and ammonium, only depletion of N and P stimulated lipid droplet production for *O.*  
152 *tauri*. While the detailed molecular mechanisms regulating lipid accumulation and oriented  
153 extrusion continue to remain elusive for this organism, these results highlight a convenient route  
154 for induction of high lipid content with concomitant high biomass yields in *O. tauri*. This has not  
155 yet been reported in other microalgae or yeast where there is typically a trade-off between high-

156 lipid content and biomass accumulation. Interestingly, an NCBI BLAST search of *O. tauri*  
157 against oleosin, perilipin, and major lipid droplet proteins typically associated with the surface of  
158 lipid droplets in other algae and higher eukaryotes shows no significant homologs. This lack of  
159 canonical genes associated with the surface of lipid droplets or their secretion as well as direct  
160 evidence of the pea-pod like extrusion suggests that this ancient organism may be employing a  
161 novel mechanism for offloading excess lipids when starved of both N and P and supplemented  
162 with carbon.

163 This organism or components of its pathway may therefore have direct applications towards  
164 enhancing industrial bioproduction of lipid feedstocks. Furthermore, the discovery of the  
165 extrusion of pea-pod like structures containing only clustered lipid droplets makes this organism  
166 an intriguing candidate model system for understanding eukaryotic lipid dynamics especially due  
167 to its simplified ultrastructure and genome. For example, future work can exploit the highly  
168 reduced pathways present in *Ostreococcus* and its genetic tractability to interrogate how the  
169 deletion of specific endogenous genes or addition of exogenous genes may force the phenotype  
170 of pea-pod like lipid droplet extrusion to more closely resemble that of higher eukaryote lipid  
171 secretion to better disentangle the complexities of lipid droplet dynamics central to processes  
172 impacting energy, health and the environment.

173

## 174 **Materials and Methods**

### 175 Media, strain maintenance, growth and starvation conditions

176 *O. tauri* cell cultures were obtained from the Roscoff Culture Collection (RCC745);  
177 strain name: OTTH0595, which has been fully sequenced<sup>8</sup>. Cultures of RCC745 were cultured  
178 in Keller media or respective K media with or without specified nutrients to create defined media  
179 conditions<sup>24</sup>. All K media based culture conditions were prepared in fresh artificial seawater  
180 (ASW) with defined amounts of nutrients. Our defined media conditions include nitrogen and  
181 elemental starvation and in some cases supplementation with excess carbon in the form of  
182 glycerol. The defined conditions for nitrogen limitation are straight forward, using the base K  
183 media by limiting nitrogen sources and supplementing with percent molar amounts of both  
184 ammonium and nitrate to create a gradient survey (-100, -90, -80, -60, -20 and -0%) of  
185 limiting nitrogen, whereas our -0% has no nitrogen removed from normal K media and -100%  
186 has no ammonium or nitrate sources present. Defined conditions for elemental starvation was



187 carried out by first growing the cells to mid to late log phase in normal K media then gently  
188 centrifuging cultures, washing and suspending them into defined K media that was prepared  
189 without specific sources of the following  $-\text{Fe}$ ,  $-\text{S}$ ,  $-\text{Mg}$ ,  $-\beta$ -glycerophosphate ( $-\text{BGP}$ ),  $-\text{NO}_3$ ,  $-\text{NH}_4$ ,  $-\text{NO}_3-\text{NH}_4$ , and  $-\text{BGP}+\text{Glycerol}$ . We recorded and displayed absorbance at 680nm and  
190  $\text{NH}_4$ ,  $-\text{NO}_3-\text{NH}_4$ , and  $-\text{BGP}+\text{Glycerol}$ . We recorded and displayed absorbance at 680nm and  
191 750nm to obtain a measure of both chlorophyll content and particulate matter, respectively, for  
192 each culture. Graphing the ratio of 750nm/680nm provided a measure of chlorophyll functional  
193 efficiency as well as possible lipid metabolic flux. Graphical analysis of each growth and  
194 starvation curve required minimal normalization due to our consistent efforts in capturing cells  
195 during mid-log stages of growth. For each experiment replicate *O. tauri* cultures were grown up  
196 to mid to late log phase under blue diurnal light ( $18-20 \mu\text{mol photons/m}^2/\text{s}$ ) in Percival Scientific  
197 light incubator (Iowa, USA), captured before stationary phase, to ensure fresh healthy cells prior  
198 to nutrient limitation, because if allowed to enter stationary phase some lipid accumulation can  
199 be observed. To prepare cell cultures for starvation survey we gently centrifuged fresh cultures at  
200  $2200\times g$  for 10 mins with swing bucket rotor centrifugation and washed cell pellets once with  
201 defined K media of interest, then suspended cells in defined media conditions and continued  
202 diurnal light entrainment for specified time courses in sealable CytoOne non-treated cell culture  
203 flasks (USA Scientific, USA) with mixing of cultures once per 24 hours.

204

#### 205 Fluorescence activated cell sorting analysis of intracellular lipid content

206 *O. tauri* cells were cultured to mid-log phase and gently centrifuged to concentration then stained  
207 with Nile Red for exactly 10 mins before each experimental measurement on the BD INFLUX  
208 flow cytometer (BD Biosciences, San Jose, CA, USA). Forward Scatter (FSC) and Side Scatter  
209 (SSC) were used to gate out any non-specific cellular debris. We analyzed specific gating in the  
210 range of known cell size of *O. tauri* to determine the fluorescence from stained neutral lipid  
211 ( $488/542\pm 13.5 \text{ nm}$ ), phospholipid ( $561/615\pm 12 \text{ nm}$ ), and natural chlorophyll autofluorescence  
212 ( $640/670\pm 15 \text{ nm}$ ) for defined populations of cells. Each individual FACS experiment was  
213 calibrated to 3.6 side scatter 10 mins before running our sample measurements in defined media  
214 cultures. We plotted the fluorescence intensity of neutral lipid and phospholipid fluorescence  
215 intensity at specific time points in scatter plots to demonstrate population dynamics for each  
216 sample condition at 72 hours into starvation. We used standard K media as a control for normal  
217 conditions and nominal lipid staining for comparison to high lipid content conditions.

218

219 *Fluorescence and SRS confocal microscopy*

220 Confocal images were obtained on Zeiss LSM 710 (Carl Zeiss AG, Germany) confocal  
221 microscope with a 100x oil immersion objective. An InTune Laser with 505nm and 535nm light  
222 was used to maximize the separation of the triglyceride (585nm) and phospholipid (638nm)  
223 emission peaks while diminishing crosstalk of the Nile Red Stained cells. In addition, we excited  
224 chlorophyll autofluorescence with 405nm light and monitored the emission profile at 680nm.  
225 Nile Red stained cells were immobilized on glass slides with poly-L-lysine and imaged  
226 immediately with z-scan slicing of 0.43 $\mu$ m to survey whole cell fluorescence labeling  
227 distribution. All fluorescence channels were set with identical gain and laser power settings to  
228 provide relative levels of fluorescent intensity. We have displayed selected slices from our z-  
229 scans and applied no adjustments of contrast or gain during post processing. Microalgae cells  
230 were stained with Hoescht 33342 DNA and Nile Red stains for imaging on a Leica SP8 Confocal  
231 Microscope using a 63 $\times$  1.40 NA water immersion objective with 1 $\times$  and 4 $\times$  zoom to satisfy  
232 Nyquist frequency. Auto-fluorescence of chlorophyll (ex: 552 nm, Em: 675-690nm) and  
233 fluorescence of Hoescht (Ex: 405, Em: 420-520nm), neutral lipid (Ex: 488, Em: 570-600nm) and  
234 phospholipid (Ex: 488, Em: 630-647nm) were monitored with bright-field channels during  
235 sequential scans with Leica HyD photon detector. SRS confocal images were obtained using a  
236 63x 1.40na objective with excitation from an APE Pico Emerald laser source with 6 picosecond  
237 pulse widths, 1032 fundamental laser, and OPO at 926.6nm (SRS DNA) with dual 850 $\pm$ 10nm  
238 short pass filters to visualize intracellular nucleic acid content false colored in cyan (Fig 3.  
239 bottom panel).

240

241 *Soft X-ray nanotomography, reconstruction and segmentation*

242 *O. tauri* cultures were grown up in standard K media to mid-log phase under blue diurnal light  
243 (18–20  $\mu$ mol photons/m<sup>2</sup>/s). To prepare cell cultures for starvation survey we gently centrifuged  
244 fresh cultures at 2200xg for 10 mins with swing bucket rotor centrifugation and washed cell  
245 pellets once with defined K media of interest then suspended cells in defined media conditions  
246 and continued diurnal light entrainment for specified time courses in sealed tubes for transport to  
247 Advanced Light Source facilities. Thin-walled glass capillaries to hold the cells for 3D imaging  
248 were pulled and assembled as described previously<sup>32</sup>. Soft x-ray tomographic imaging was



249 carried out on cryopreserved specimens to mitigate the effects of radiation damage and prevent  
250 movement of fine structural details during data acquisition<sup>33,34</sup>. Prior to imaging, cells were  
251 pelleted to a high titer and loaded into tapered specimen capillaries (~5-6  $\mu\text{m}$  in diameter at the  
252 tip) using a standard micropipette. Once loaded into capillaries, cells were immediately  
253 cryopreserved by rapid plunging into liquid propane using a custom fast-freezing apparatus.  
254 Cells were mixed with 6 $\mu\text{m}$  beads to maintain cellular integrity during cryopreservation. Frozen  
255 specimens were cryo-transferred into custom storage boxes using a home-built cryo-transfer  
256 device and stored in liquid nitrogen.

257 Soft x-ray data acquisition was carried out on beamline 2.1, a soft x-ray microscope in the  
258 National Center for X-Ray Tomography (NCXT) located at the Advanced Light Source in  
259 Berkeley, California<sup>35</sup>. The microscope soft x-ray illumination was generated by a bend-magnet  
260 in the synchrotron lattice and focused onto the specimen by a Fresnel Zone Plate (FZP)  
261 condenser. Specimen illumination was order-sorted by a pinhole positioned just in front of the  
262 specimen. A second zone plate, located downstream of the specimen, magnified and focused an  
263 image of the specimen on a CCD detector. During data collection, the cells were maintained in a  
264 stream of helium gas that had been cooled to liquid nitrogen temperatures. Each tomographic  
265 dataset (i.e., 90 projection images spanning a range of 180<sup>o</sup>) was collected using Fresnel zone  
266 plate based objective lens with a resolution of 50 nm. Exposure times for each projection image  
267 ranged from 150 to 300 msec. The software suite AREC3D<sup>36</sup> was used to align the projection  
268 images calculate tomographic reconstructions.

269 Tomography segmentation was completed using in-house code written in MATLAB (MATLAB  
270 9.1, The MathWorks Inc., Natick, MA, 2017). The segmentation primarily relies on threshold  
271 ranges for different intracellular structures of interest. The segmenation code generates montages  
272 for each cell membrane, lipid bodies and chloroplast which are then used to generate the 3-D  
273 models and animations in Drishti<sup>37</sup>. For the supplemental video, the montages generated by the  
274 MATLAB code for the cell, chloroplast and lipid bodies were overlaid using the MIJ library that  
275 provides the platform to integrate MATLAB and ImageJ<sup>38</sup>. The 2-D animations were generated  
276 using ImageJ and 3-D animations using Drishti. Slices of the 3-D animation were embedded to  
277 the video using ImageJ.

278  
279

## 280 Quantification of Cell Biomass and Small Batch Lipid Extraction

281 Cell cultures were grown and resuspended into starvation and/or supplementation conditions and  
282 allowed to incubate for 72 hours before cell density measurements and harvesting. We harvested  
283 and partially dried whole culture content using 0.45 micron PVDF filters (Merck Millipore,  
284 USA) with a vacuum pressure at 25 psi. We dried the cell biomass before weighing on an  
285 analytical balance by using a turbo pump to pull a vacuum down to 25 inHg. The dry weight of  
286 each filter was obtained before and after filtration of cell biomass to measure total cell dry  
287 weights of each culture. We placed each dried filter with cells and material attached into glass  
288 tubes for lipid extraction. The lipid extraction followed a modified procedure prescribed by  
289 Olmstead et al. to quantify total lipids in microalgal cells with the modification of 1M NaCl in  
290 the place of water<sup>39</sup>. We carefully collected the bottom chloroform organic layer during each  
291 extraction containing the total lipid content and combined these extracts into pre-weighed glass  
292 tube for drying under nitrogen gas at 40°C using the Techne Sample Concentrator with model  
293 DB-3D Dri-Block (Bibby Scientific Limited, UK). Post drying, we weighed each tube for total  
294 dry lipid weight and combined the dry cell weights to determine the percentage of dry lipid  
295 content (mg) per dry cell weight (mg).

296  
297

## 298 **References and Notes**

- 299
- 300 1 Levering, J., Broddrick, J. & Zengler, K. Engineering of oleaginous organisms for lipid production.  
301 *Curr Opin Biotechnol* 36, 32-39, doi:10.1016/j.copbio.2015.08.001 (2015).
  - 302 2 Elliott, D. C. Review of recent reports on process technology for thermochemical conversion of whole  
303 algae to liquid fuels. *Algal Res* 13, 255-263, doi:10.1016/j.algal.2015.12.002 (2016).
  - 304 3 Jones, C. S. & Mayfield, S. P. Algae biofuels: versatility for the future of bioenergy. *Curr Opin*  
305 *Biotechnol* 23, 346-351, doi:10.1016/j.copbio.2011.10.013 (2012).
  - 306 4 Horn, P. J. & Benning, C. The plant lipidome in human and environmental health. *Science* 353, 1228-  
307 1232, doi:10.1126/science.aaf6206 (2016).
  - 308 5 Courties, C. et al. Smallest Eukaryotic Organism. *Nature* 370, 255-255, doi:DOI 10.1038/370255a0  
309 (1994).
  - 310 6 Palenik, B. et al. The tiny eukaryote *Ostreococcus* provides genomic insights into the paradox of  
311 plankton speciation. *P Natl Acad Sci USA* 104, 7705-7710, doi:10.1073/pnas.0611046104 (2007).
  - 312 7 Henderson, G. P., Gan, L. & Jensen, G. J. 3-D ultrastructure of *O. tauri*: electron cryotomography of  
313 an entire eukaryotic cell. *PLoS One* 2, e749, doi:10.1371/journal.pone.0000749 (2007).

- 314 8 Derelle, E. *et al.* Genome analysis of the smallest free-living eukaryote *Ostreococcus tauri* unveils  
315 many unique features. *Proc Natl Acad Sci U S A* 103, 11647-11652, doi:10.1073/pnas.0604795103  
316 (2006).
- 317 9 Blanc-Mathieu, R. *et al.* An improved genome of the model marine alga *Ostreococcus tauri* unfolds  
318 by assessing Illumina de novo assemblies. *BMC Genomics* 15, 1103, doi:10.1186/1471-2164-15-1103  
319 (2014).
- 320 10 Subirana, L. *et al.* Morphology, genome plasticity, and phylogeny in the genus *Ostreococcus* reveal a  
321 cryptic species, *O. mediterraneus* sp. nov. (Mamiellales, Mamiellophyceae). *Protist* 164, 643-659,  
322 doi:10.1016/j.protis.2013.06.002 (2013).
- 323 11 Noordally, Z. B. & Millar, A. J. Clocks in algae. *Biochemistry* 54, 171-183, doi:10.1021/bi501089x  
324 (2015).
- 325 12 Le Bihan, T. *et al.* Label-free quantitative analysis of the casein kinase 2-responsive  
326 phosphoproteome of the marine minimal model species *Ostreococcus tauri*. *Proteomics* 15, 4135-  
327 4144, doi:10.1002/pmic.201500086 (2015).
- 328 13 Le Bihan, T. *et al.* Shotgun proteomic analysis of the unicellular alga *Ostreococcus tauri*. *J*  
329 *Proteomics* 74, 2060-2070, doi:10.1016/j.jprot.2011.05.028 (2011).
- 330 14 Fouilland, E. *et al.* Productivity and growth of a natural population of the smallest free-living  
331 eukaryote under nitrogen deficiency and sufficiency. *Microb Ecol* 48, 103-110, doi:10.1007/s00248-  
332 003-2035-2 (2004).
- 333 15 Juergens, M. T., Disbrow, B. & Shachar-Hill, Y. The Relationship of Triacylglycerol and Starch  
334 Accumulation to Carbon and Energy Flows during Nutrient Deprivation in *Chlamydomonas*  
335 *reinhardtii*. *Plant Physiol* 171, 2445-2457, doi:10.1104/pp.16.00761 (2016).
- 336 16 Fields, M. W. *et al.* Sources and resources: importance of nutrients, resource allocation, and ecology  
337 in microalgal cultivation for lipid accumulation. *Appl Microbiol Biotechnol* 98, 4805-4816,  
338 doi:10.1007/s00253-014-5694-7 (2014).
- 339 17 Alboresi, A. *et al.* Light Remodels Lipid Biosynthesis in *Nannochloropsis gaditana* by Modulating  
340 Carbon Partitioning between Organelles. *Plant Physiol* 171, 2468-2482, doi:10.1104/pp.16.00599  
341 (2016).
- 342 18 Cakmak, T. *et al.* Differential effects of nitrogen and sulfur deprivation on growth and biodiesel  
343 feedstock production of *Chlamydomonas reinhardtii*. *Biotechnol Bioeng* 109, 1947-1957,  
344 doi:10.1002/bit.24474 (2012).
- 345 19 Du, Z. Y. & Benning, C. Triacylglycerol Accumulation in Photosynthetic Cells in Plants and Algae.  
346 *Subcell Biochem* 86, 179-205, doi:10.1007/978-3-319-25979-6\_8 (2016).
- 347 20 Zienkiewicz, K., Du, Z. Y., Ma, W., Vollheyde, K. & Benning, C. Stress-induced neutral lipid  
348 biosynthesis in microalgae - Molecular, cellular and physiological insights. *Biochim Biophys Acta*  
349 1861, 1269-1281, doi:10.1016/j.bbali.2016.02.008 (2016).
- 350 21 Lelandais, G. *et al.* *Ostreococcus tauri* is a new model green alga for studying iron metabolism in  
351 eukaryotic phytoplankton. *BMC Genomics* 17, 319, doi:10.1186/s12864-016-2666-6 (2016).
- 352 22 Sanz-Luque, E., Chamizo-Ampudia, A., Llamas, A., Galvan, A. & Fernandez, E. Understanding  
353 nitrate assimilation and its regulation in microalgae. *Frontiers in Plant Science* 6, doi:ARTN 899  
354 10.3389/fpls.2015.00899 (2015).

- 355 23 Ghoshroy, S. & Robertson, D. L. Molecular evolution of nitrogen assimilatory enzymes in marine  
356 prasinophytes. *J Mol Evol* 80, 65-80, doi:10.1007/s00239-014-9659-3 (2015).
- 357 24 Keller, M. D., Selvin, R. C., Claus, W. & Guillard, R. R. L. Media for the Culture of Oceanic  
358 Ultraphytoplankton. *J Phycol* 23, 633-638 (1987).
- 359 25 Degraeve-Guilbault, C. *et al.* Glycerolipid Characterization and Nutrient Deprivation-Associated  
360 Changes in the Green Picoalga *Ostreococcus tauri*. *Plant Physiol* 173, 2060-2080,  
361 doi:10.1104/pp.16.01467 (2017).
- 362 26 Barrios-Llerena, M. E., Pritchard, J. C., Kerr, L. E. & Le Bihan, T. The use of a novel quantitation  
363 strategy based on Reductive Isotopic Di-Ethylation (RIDE) to evaluate the effect of glufosinate on the  
364 unicellular algae *Ostreococcus tauri*. *J Proteomics* 74, 2798-2809, doi:10.1016/j.jprot.2011.06.014  
365 (2011).
- 366 27 Foresi, N., Correa-Aragunde, N., Santolini, J. & Lamattina, L. Analysis of the Expression and  
367 Activity of Nitric Oxide Synthase from Marine Photosynthetic Microorganisms. *Methods Mol Biol*  
368 1424, 149-162, doi:10.1007/978-1-4939-3600-7\_13 (2016).
- 369 28 Abad, S. & Turon, X. Valorization of biodiesel derived glycerol as a carbon source to obtain added-  
370 value metabolites: Focus on polyunsaturated fatty acids. *Biotechnol Adv* 30, 733-741,  
371 doi:10.1016/j.biotechadv.2012.01.002 (2012).
- 372 29 Kanehisa, M., Furumichi, M., Tanabe, M., Sato, Y. & Morishima, K. KEGG: new perspectives on  
373 genomes, pathways, diseases and drugs. *Nucleic Acids Res* 45, D353-D361, doi:10.1093/nar/gkw1092  
374 (2017).
- 375 30 Honvo-Houeto, E., Henry, C., Chat, S., Layani, S. & Truchet, S. The endoplasmic reticulum and  
376 casein-containing vesicles contribute to milk fat globule membrane. *Mol Biol Cell* 27, 2946-2964,  
377 doi:10.1091/mbc.E16-06-0364 (2016).
- 378 31 Barneda, D. & Christian, M. Lipid droplet growth: regulation of a dynamic organelle. *Curr Opin Cell*  
379 *Biol* 47, 9-15, doi:10.1016/j.ceb.2017.02.002 (2017).
- 380 32 Parkinson, D. Y., McDermott, G., Etkin, L. D., Le Gros, M. A. & Larabell, C. A. Quantitative 3-D  
381 imaging of eukaryotic cells using soft X-ray tomography. *J. Struct. Biol.* 162, 380-386,  
382 doi:10.1016/j.jsb.2008.02.003 (2008).
- 383 33 McDermott, G. *et al.* Visualizing and quantifying cell phenotype using soft X-ray tomography.  
384 *Bioessays* 34, 320-327, doi:10.1002/bies.201100125 (2012).
- 385 34 Le Gros, M. A. *et al.* in *Comprehensive Biophysics* (ed H. Egelman Edward) 90-110 (Elsevier, 2012).
- 386 35 Le Gros, M. A. *et al.* Biological soft X-ray tomography on beamline 2.1 at the Advanced Light  
387 Source. *Journal of synchrotron radiation* 21, 1370-1377, doi:10.1107/S1600577514015033 (2014).
- 388 36 Parkinson, D. Y., Knoechel, C., Yang, C., Larabell, C. A. & Le Gros, M. A. Automatic alignment and  
389 reconstruction of images for soft X-ray tomography. *J. Struct. Biol.* 177, 259-266,  
390 doi:10.1016/j.jsb.2011.11.027 (2012).
- 391 37 Limaye, A. Drishti, A Volume Exploration and Presentation Tool. *Proc Spie* 8506, doi:Unsp 85060x  
392 10.1117/12.935640 (2012).
- 393 38 Sage, D., Prodanov, D., Tinevez, J.-Y. & Schindelin, J. in *ImageJ User & Developer Conference*  
394 (2012).

395 39 **Olmstead, I. L. *et al.* A quantitative analysis of microalgal lipids for optimization of biodiesel and**  
396 **omega-3 production. *Biotechnol Bioeng* 110, 2096-2104, doi:10.1002/bit.24844 (2013).**

397  
398

399 **Acknowledgements:** Work was supported by DOE-BER Mesoscale to Molecules Bioimaging  
400 Project FWP# 66382. A portion of the research was performed using the Environmental  
401 Molecular Sciences Laboratory (EMSL), a national scientific user facility sponsored by the  
402 Department of Energy's Office of Biological and Environmental Research and located at PNNL.  
403 This research also used resources of the Advanced Light Source, which is a DOE Office of  
404 Science User Facility under contract no. DE-AC02-05CH11231.

405

406 **Author contributions:** C.S. and J.E. devised experiments for the study. C.S. conducted  
407 experiments. W.C., J.C., E.P., M.T., R.B., A.E., H.W., and G.M. all contributed to the study.

408

409

410  
411  
412

## Figures and Captions

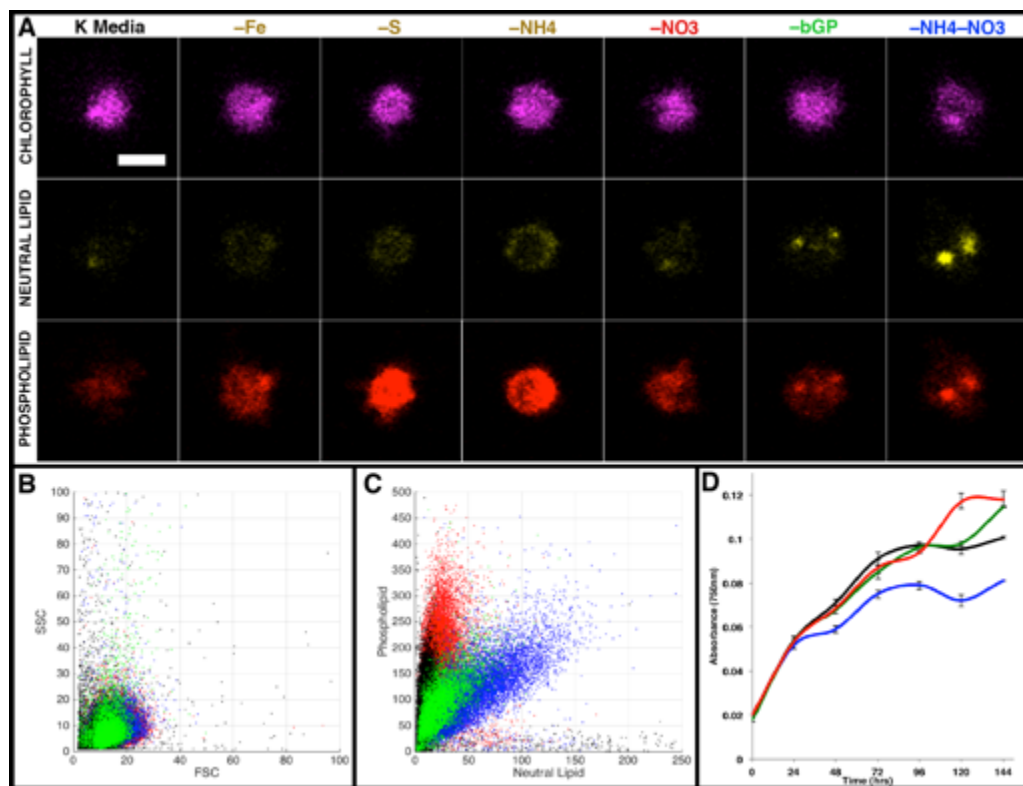

413  
414 **Fig. 1: Nutrient deprivation of phosphate and nitrogen induces lipid droplet formation.** A)  
415 Confocal fluorescence microscopy (1 μm scale bar) of *O. tauri* cells stained with Nile Red after  
416 72 hours of culturing in defined media conditions. B) Cell culture growth monitored at 750nm  
417 with colors corresponding to the labels in (A). Same cell cultures were analyzed by FACS to  
418 obtain side-scattered light (SSC) vs forward-scattered light (FSC) (C) and PL versus NL (D)  
419 plots.

420  
421



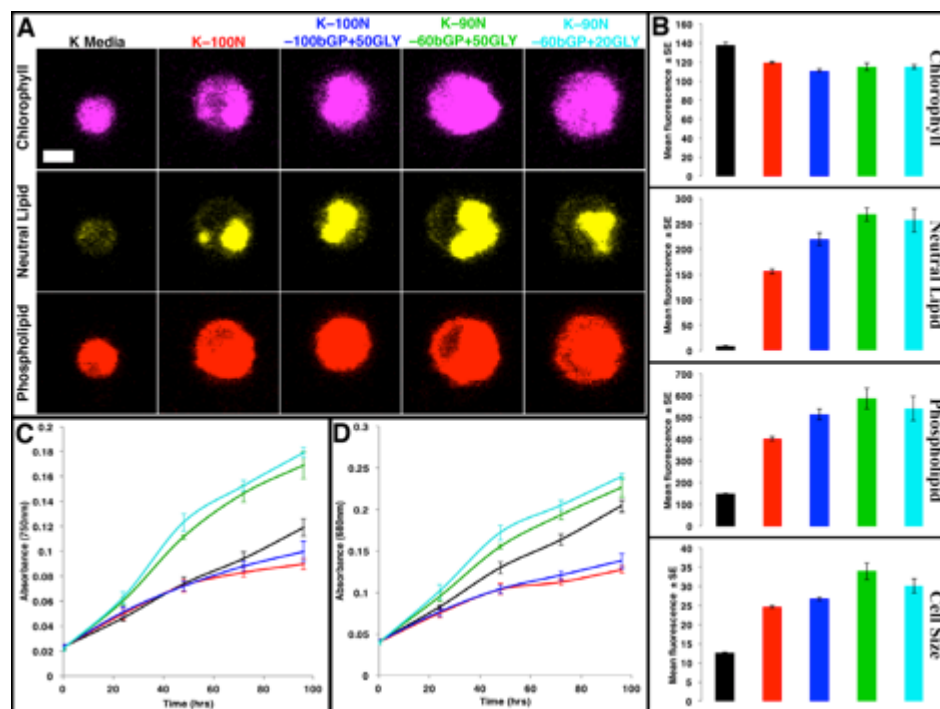

422

423 **Fig. 2: Conditions for high biomass and neutral lipid accumulation.** A) Confocal  
424 fluorescence microscopy (1 $\mu$ m scale) of *O. tauri* cells stained with Nile red after 96 hours of  
425 culturing in defined K media conditions. B) The same cell cultures were analyzed by FACS to  
426 obtain population level data. Cell culture growth was monitored for chlorophyll content at  
427 680nm (C) and particulates at 750nm (D). All colors representative of labels from (A).

428

429

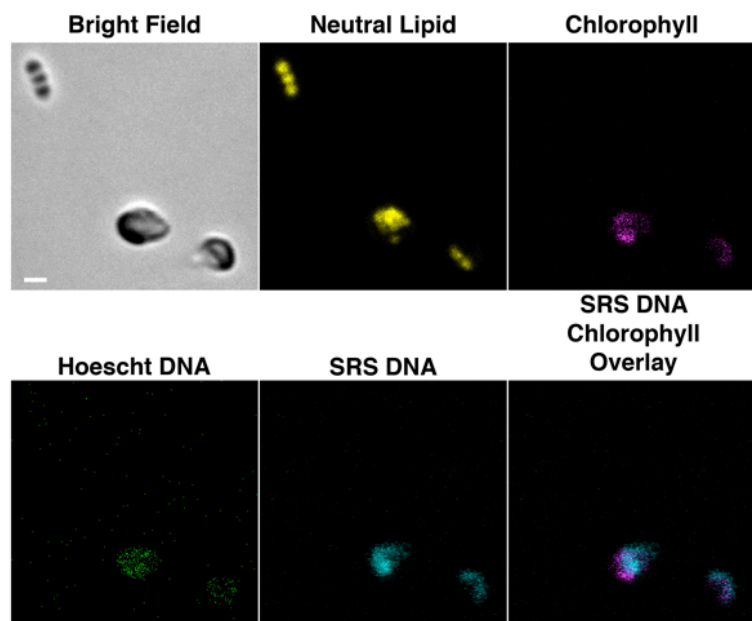

430

431 **Fig. 3: Confirmation of no nucleic acid or chlorophyll autofluorescence in the pea-pod**  
432 **extruded structures.** The bright field image depicts healthy *O. tauri* cells (grown in K-90%N-  
433 60%P+20mMGlycerol) in the and pea-pod like extrusions. No detectable signal for DNA or  
434 chlorophyll was detected in the LD containing pea-pod structures using both label-based and  
435 label-free imaging approaches.

436

437

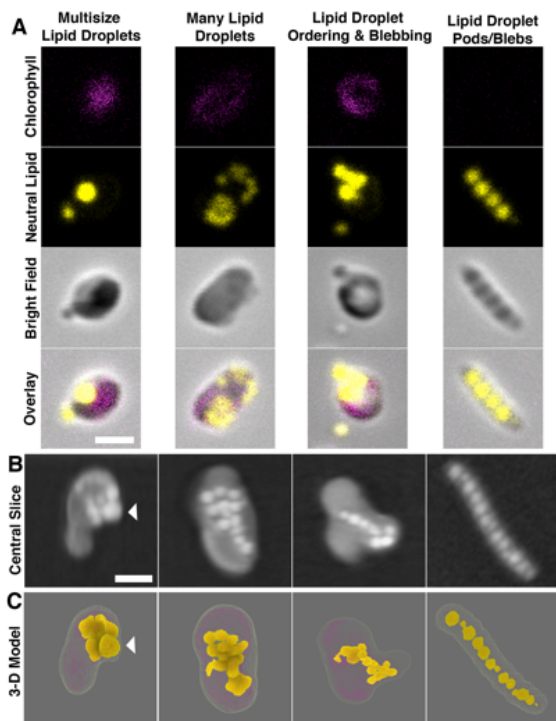

438

439 **Fig. 4: Visualizing various cellular ultrastructures and lipid droplet arrangements.**

440 Confocal microscopy (A) of K-90%N-60%bGP+20mMGlycerol cultures at 96 hours were  
441 stained with Nile Red to reveal *O. tauri* cells containing various distributions of lipids such as  
442 multisize lipid droplets, many lipid droplets, ordered lipid droplets with lipid droplets outside the  
443 cell, and pea pod-like lipid structures. Central slices from the nanotomography reconstructions  
444 (B) and segmented 3-D models (C) highlight examples of the various lipid droplet sizes and  
445 distributions that included multisize lipid droplets, ordered lipid droplets extrusion events and  
446 pea pod-like structures similar in organization and appearance to those in (A). White bars  
447 represent 1 $\mu$ m scale and white arrow identifies same large lipid body from central slice to  
448 segmented 3-D model.

449

450

451

452

453 **Supplementary Materials**  
454 Supplemental Figures 1-4, Supplemental Movie 1  
455  
456

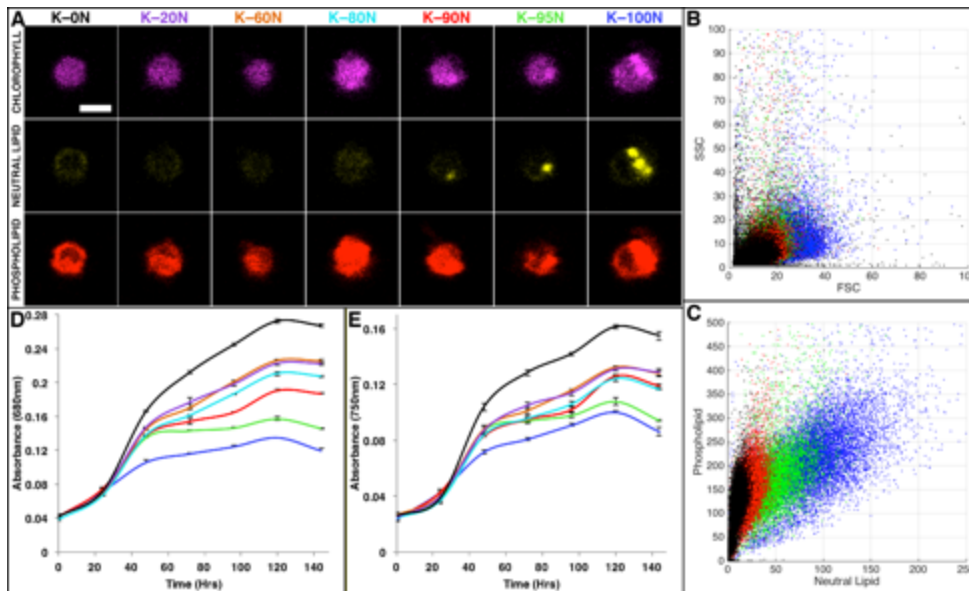

457  
458  
459 **Supplemental Figure 1: Nitrogen depletion revealed incremental increases in neutral lipid**  
460 Confocal fluorescence microscopy (A) of varying total nitrogen cell cultures stained with Nile  
461 Red revealed incremental lipid droplet formation with decreasing nitrogen content. Growth  
462 curves of cultures were collected by monitoring absorbance at 680nm (D) and 750nm (E) for  
463 chlorophyll and biomass, respectively. FACS of cultures stained with Nile Red displayed slight  
464 increases in cell size (FSC) from SSC vs FSC scatter plot (B) and increasing neutral lipid and  
465 phospholipid content with decreasing total nitrogen from the scatter plot of Phospholipid vs  
466 Neutral Lipid (C) signal.  
467

468  
469

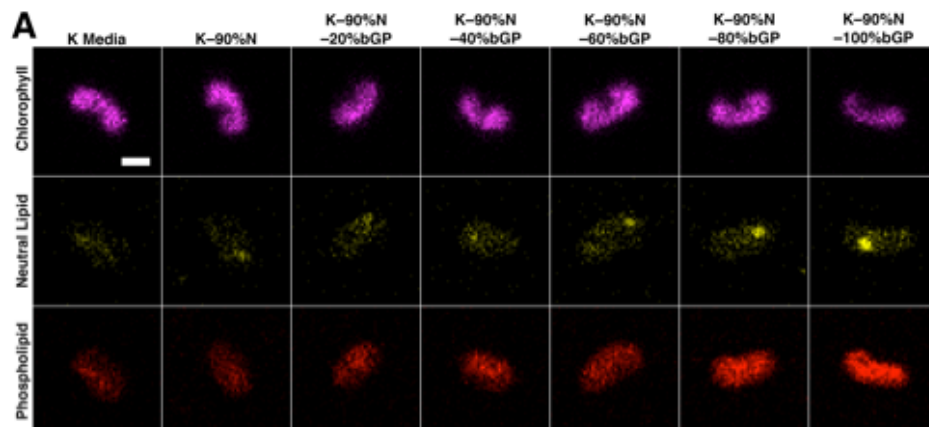

470  
471  
472  
473  
474  
475  
476  
477  
478  
479  
480

**Supplemental Figure 2: Variable phosphate depletion series with simultaneous 90% nitrogen starvation.** Confocal fluorescence microscopy (A) of cultures with 90% total nitrogen depletion and incremental depletion of beta-glycerol phosphate revealed increasing neutral lipid and phospholipid content with slight decreases in chlorophyll auto-fluorescence. Cell culture growth was monitored at absorbance wavelengths 680nm (B) and 750nm (C) and displayed that beyond K-90%N-60%bGP cells suffered dramatic biomass depletion.

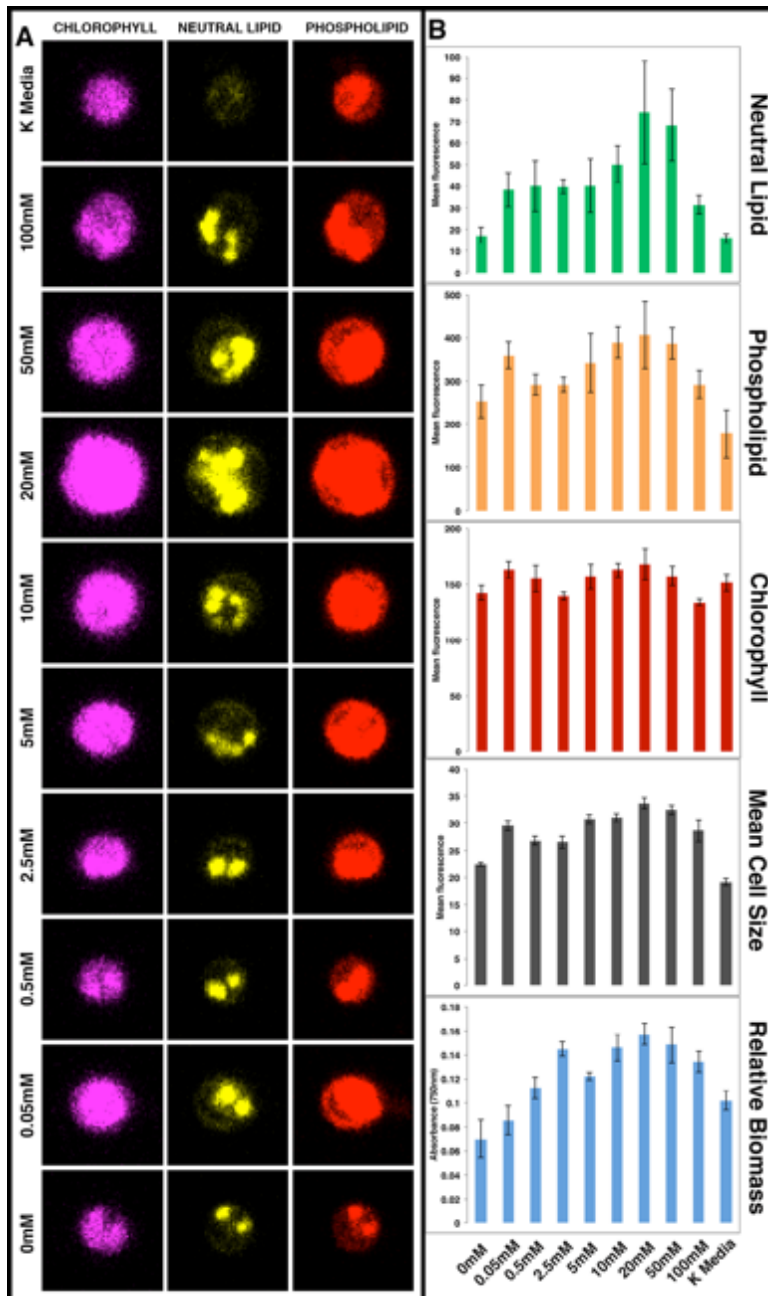

481  
482  
483  
484  
485  
486  
487  
488  
489  
490  
491  
492

**Supplemental Figure 3: Glycerol concentration dependent cell size and TAG lipid accumulation.** A) Confocal fluorescence microscopy (1 $\mu\text{m}$  scale bar) of *O. tauri* cells after 72 hours of culturing in defined K media condition K-90%N-100%bGP with varying glycerol concentration. B) Cell culture growth was monitored at 750nm (full data not shown) for relative biomass at 96 hours. The same cell cultures were analyzed by FACS to obtain neutral lipid (green bar graph), phospholipid fluorescence (orange bar graph), chlorophyll autofluorescence (red bar graph), forward scattered light (dark grey bar graph), and 750nm Absorbance at 72 hours (light blue bar graph). Error bars represent the error in five biological replicate cultures.



493  
494  
495

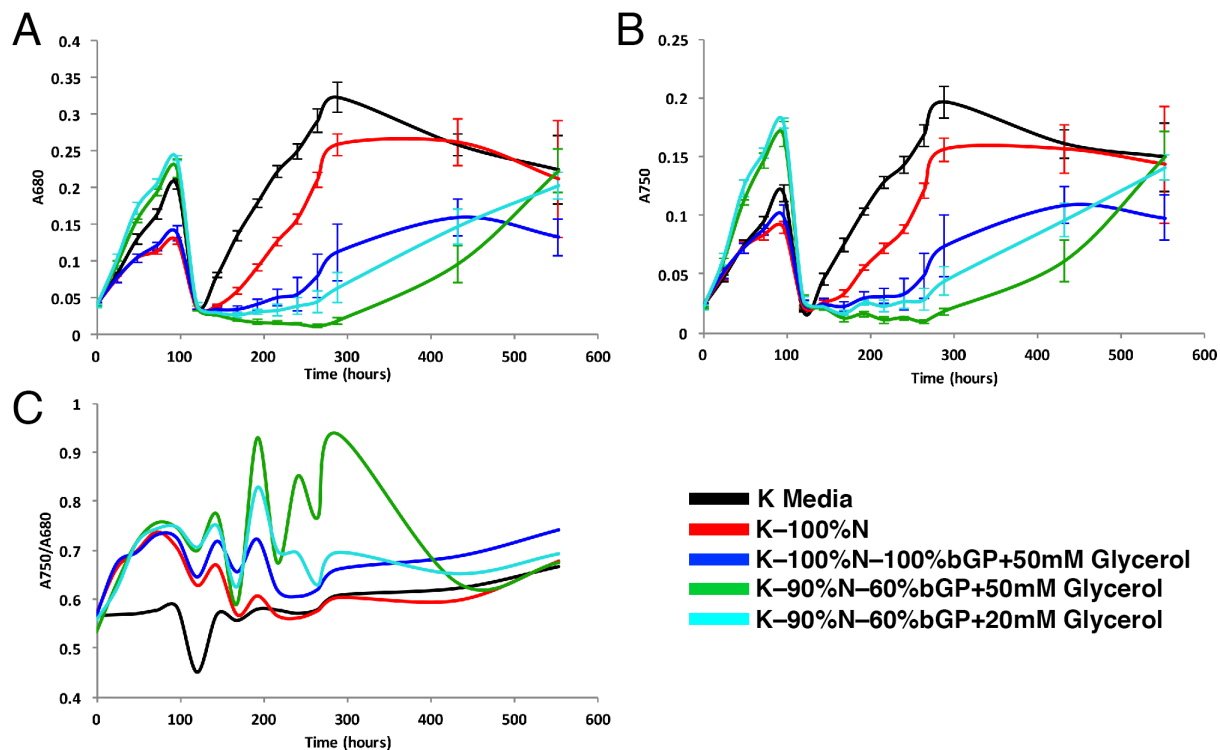

496  
497  
498  
499  
500  
501  
502  
503  
504

**Supplemental Figure 4: Recovery of normal growth following a batch dilution from starvation conditions.** Following 120 hours of incubation in various media, each culture was spun down, washed in normal K media twice, then resuspended in fresh K media to track recovery for the next 432 hours. All initial conditions supplemented with glycerol showed a lag time of several days but then grew to standard density. Error bars represent the error in five biological replicate cultures.

505  
506  
507  
508  
509  
510  
511  
512  
513  
514  
515  
516  
517  
  
518

**Supplemental Movie 1: Movie of *O. tauri* cell caught in process of extrusion. X-ray tomogram of cell containing oriented lipid droplets in a pea-pod like structure grown in K-90%N-60%P+50mM Glycerol for 96 hours.**
